# Supplementary material for: Highly crystalline sulfur and oxygen co-doped g-C3N4 nanosheets as an advanced photocatalyst for efficient hydrogen generation
Source: Royal Society of Chemistry journal article supplement (doi:10.1039/d2cy00824f), 2022-01-01
Supplement: d2cy00824f1.pdf [file d2cy00824f1.pdf]

## Supporting Information

### Highly crystalline sulfur and oxygen co-doped g-C<sub>3</sub>N<sub>4</sub> nanosheets as an advanced photocatalyst for efficient hydrogen generation

Xiaowei Jia,<sup>a</sup> Yunfeng Li,<sup>b,\*</sup> Xianchun Liu,<sup>a</sup> Xiaodan Yu,<sup>a</sup> Cong Wang,<sup>c,\*</sup> Zhan Shi,<sup>d</sup> and Yan Xing<sup>a,\*</sup>

#### 1. Experimental Section

##### 1.1 Characterizations

The X-ray powder diffraction (XRD) patterns were conducted on Siemens D5005 Diffractometer at 40 kV and 40 mA using Cu K $\alpha$  radiation ( $\lambda=1.5418\text{\AA}$ ). The scanning electron microscopy (SEM) and the Energy Dispersive Spectrometer (EDS) analyses were performed on XL30 ESEM FEG microscope. Transmission electron microscopic (TEM), high-resolution transmission electron microscopy (HRTEM) and elemental mapping images were obtained on JEM-2100F microscope. X-ray photoelectron spectroscopy (XPS), ultraviolet-visible diffuse reflectance spectroscopy (UV-vis DRS) and Photoluminescence (PL) spectra were measured on Thermo ESCALAB 250 XPS instrument, Cary 7000 spectrometer and FLSP920 Edinburgh fluorescence spectrometer, respectively. Brunauer–Emmett–Teller (BET) surface area of the samples were determined by a Micromeritics Tristar 3000 analyzer at 77.4 K. Electrochemical analyses were carried out on an electrochemical workstation (CHI660E, China) with a three-electrode system using 0.1 M Na<sub>2</sub>SO<sub>4</sub> solution as electrolyte.

##### 1.2 Computational methods

All density functional theory (DFT) calculations in this work were performed using Vienna *ab initio* simulation package (VASP).<sup>1,2</sup> The Perdew-Burke-Ernzerhof (PBE) exchange–correlation functional of the generalized gradient approximation (GGA) was utilized for describing the electron interactions,<sup>3,4</sup> while the projector augmented wave (PAW) pseudopotential was used to treat the core electrons.<sup>5</sup> The van der Waals interactions were described by using Grimme’s DFT-D3 method.<sup>6</sup> The energy cutoff and convergence criteria for the energy and force were set to 500 eV,  $1 \times 10^{-5}$  eV, and 0.02 eV/Å, respectively.

### ***1.3 Apparent quantum efficiency (AQE) calculation method***

The AQE was measured by using a Pyrex top-irradiation-type reaction vessel and a 300 W Xe lamp fitted with different band-pass filters of 420, 450, 475, 500, 550, and 560 nm (FWHM = 15 nm), the average intensity of monochromic light was determined by using CEL-NP 2000 photo-radiometer. For the AQE at  $420 \pm 15$  nm, the average intensity of irradiation was determined to be 9.77 mW and the irradiation area was 1.0 cm<sup>2</sup>. The AQE value was calculated by the following Equation:

$$\begin{aligned} \text{AQE (\%)} &= \frac{\text{number of reacted electrons}}{\text{number of incident electrons}} \times 100\% \\ &= \frac{\text{number of evolved } H_2 \text{ molecules} \times 2}{\text{number of incident electrons}} \times 100\% \end{aligned}$$

## 2. Results

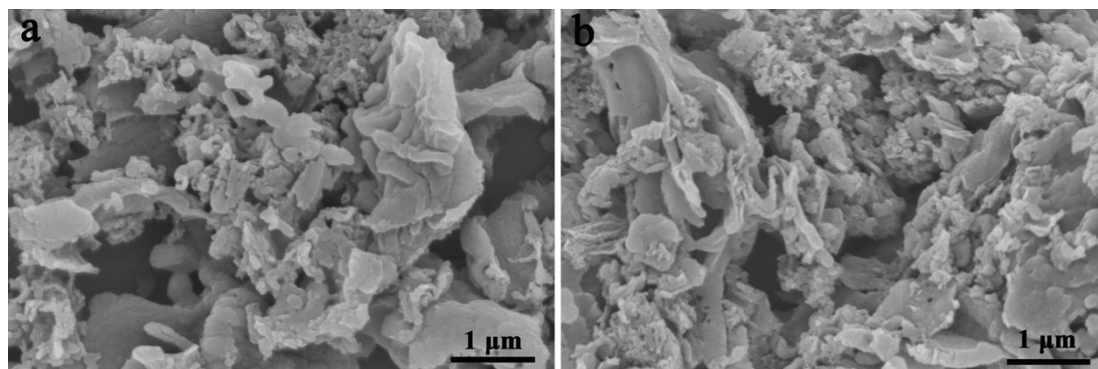

Figure S1. TEM images of (a) CNS and (b) SOCNS samples.

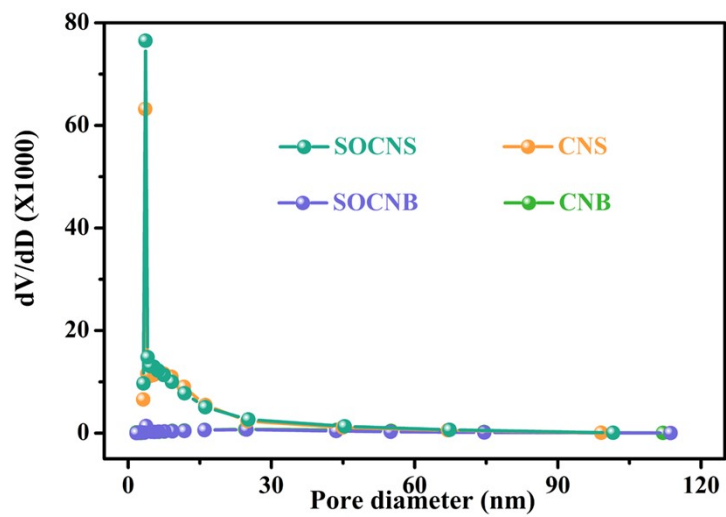

Figure S2. Pore size distribution curves of CNB, CNS, SOCNB and SOCNS.

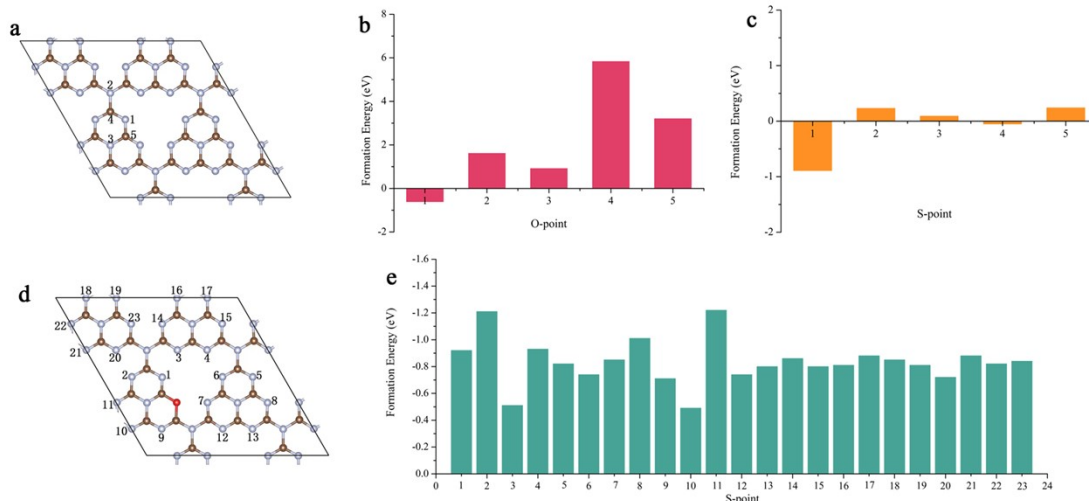

Figure S3. (a) Structure of g-C<sub>3</sub>N<sub>4</sub> (brown: C; gray: N), the numbers 1-5 are the selected sites that O/S replaces; formation energies for (b) the 5 O doped g-C<sub>3</sub>N<sub>4</sub> and (c) 5 S doped g-C<sub>3</sub>N<sub>4</sub> configurations; (d) structure of O and S co-doped g-C<sub>3</sub>N<sub>4</sub> (brown: C; gray: N; red: O), the numbers 1-23 are the selected sites that S replaces, (e) formation energies for the 23 S, O co-doped g-C<sub>3</sub>N<sub>4</sub> configurations.

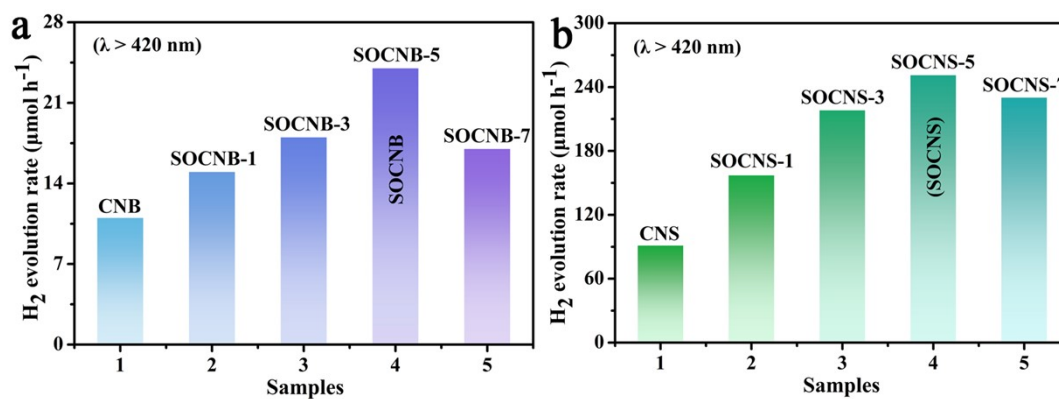

Figure S4. Hydrogen evolution rate of (a) SOCNB-X and (b) SOCNS-X samples.

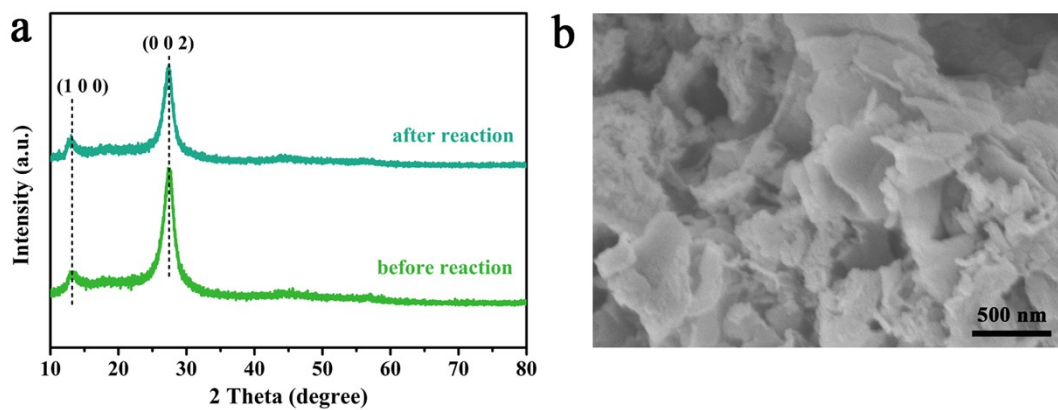

Figure S5. (a) XRD pattern and (b) SEM image of SOCNS after the photocatalytic H<sub>2</sub> evolution reaction.

Table S1. Comparison of the full width at half maximum of as-prepared samples at the main XRD signal.

| Sample | FWHM (nm) |
|--------|-----------|
| CNB    | 2.25      |
| CNS    | 2.68      |
| SOCNB  | 1.73      |
| SOCNS  | 2.14      |

Table S2. The wavelength dependent AQE for photocatalytic H<sub>2</sub> evolution reactions over the SOCNS photocatalyst.

| Wavelengths<br>( $\lambda$ , nm) | H <sub>2</sub> evolved<br>( $\mu\text{mol h}^{-1}$ ) | Catalyst mass<br>(mg) | Light power<br>(mW) | AQE (%) |
|----------------------------------|------------------------------------------------------|-----------------------|---------------------|---------|
| 420 $\pm$ 15                     | 101                                                  | 10                    | 9.77                | 23.75   |
| 450 $\pm$ 15                     | 53                                                   | 10                    | 13.42               | 17.29   |
| 475 $\pm$ 15                     | 30                                                   | 10                    | 21.89               | 6.00    |
| 500 $\pm$ 15                     | 9                                                    | 10                    | 27.15               | 1.45    |
| 550 $\pm$ 15                     | 4                                                    | 10                    | 16.72               | 1.04    |
| 600 $\pm$ 15                     | 2                                                    | 10                    | 12.11               | 0.72    |

Table S3. Comparison of photocatalytic H<sub>2</sub> evolution performance of SOCNS with some previous doped g-C<sub>3</sub>N<sub>4</sub>-based photocatalysts in recent years.

| Photocatalyst                                  | Amount (mg) | Light source (nm) | H <sub>2</sub> evolution (μmol/h) | AQE (420 nm)  | Ref.             |
|------------------------------------------------|-------------|-------------------|-----------------------------------|---------------|------------------|
| S doped g-C <sub>3</sub> N <sub>4</sub>        | 10          | λ ≥ 400           | 31.7                              | 3.02%         | S7               |
| S doped g-C <sub>3</sub> N <sub>4</sub>        | 50          | λ ≥ 420           | 311.27                            | 10%           | S8               |
| S doped g-C <sub>3</sub> N <sub>4</sub>        | 50          | λ ≥ 400           | 567.7                             | 13.69%        | S9               |
| S doped g-C <sub>3</sub> N <sub>4</sub>        | 50          | λ ≥ 420           | 26.275                            | 3.02%         | S10              |
| O doped g-C <sub>3</sub> N <sub>4</sub>        | 20          | λ ≥ 420           | 73.84                             | 4.22%         | S11              |
| O doped g-C <sub>3</sub> N <sub>4</sub>        | 30          | λ ≥ 420           | 31.51                             | 13.04%        | S12              |
| O doped g-C <sub>3</sub> N <sub>4</sub>        | 10          | λ ≥ 420           | 136.1                             | 24.7%         | S13              |
| B doped g-C <sub>3</sub> N <sub>4</sub>        | 5           | λ ≥ 420           | 19                                | 10.6%         | S14              |
| S, K co-doped g-C <sub>3</sub> N <sub>4</sub>  | 30          | λ ≥ 420           | 263.4                             | 70%           | S15              |
| Na, O co-doped g-C <sub>3</sub> N <sub>4</sub> | 50          | λ ≥ 400           | 110                               | 22.3%         | S16              |
| C, P co-doped g-C <sub>3</sub> N <sub>4</sub>  | 50          | λ ≥ 420           | 74.67                             | 2.14%         | S17              |
| C, N co-doped g-C <sub>3</sub> N <sub>4</sub>  | 5           | λ ≥ 420           | 91.9                              | 9.83%         | S18              |
| B, O co-doped g-C <sub>3</sub> N <sub>4</sub>  | 50          | λ ≥ 420           | 487.6                             | 8.1%          | S19              |
| Mo, S co-doped g-C <sub>3</sub> N <sub>4</sub> | 25          | λ ≥ 420           | 7.35                              | 0.24%         | S20              |
| C, O co-doped g-C <sub>3</sub> N <sub>4</sub>  | 20          | λ ≥ 420           | 51.9                              | 16.6%         | S21              |
| <b>SOCNS</b>                                   | <b>10</b>   | <b>λ ≥ 420</b>    | <b>251</b>                        | <b>23.75%</b> | <b>This work</b> |

## References

- [1] G. Kresse and J. Hafner, *Phys. Rev. B: Condens. Matter Mater. Phys.*, **1993**, *48*, 13115.
- [2] G. Kresse and J. Hafner, *Phys. Rev. B: Condens. Matter Mater. Phys.*, **1996**, *54*, 11169.
- [3] G. Kresse and J. Furthmüller, *Comput. Mater. Sci.*, **1996**, *6*, 15.
- [4] J. P. Perdew and Y. Wang, *Phys. Rev. B: Condens. Matter Mater. Phys.*, **1992**, *45*, 13244.
- [5] P. E. Blöchl, *Phys. Rev. B: Condens. Matter Mater. Phys.*, **1994**, *50*, 17953.
- [6] S. Grimme, *J. Comput. Chem.*, **2006**, *27*, 1787.
- [7] Y. Li, S. Wang, W. Chang, L. Zhang, Z. Wu, S. Song, Y. Xing, *J. Mater. Chem. A*, **2019**, *7*, 20640.
- [8] L. Luo, Z. Gong, J. Ma, K. Wang, H. Zhu, K. Li, L. Xiong, X. Guo, J. Tang, *Appl. Catal., B*, **2021**, *284*, 119742.
- [9] T. Fei, C. Qin, Y. Zhang, G. Dong, Y. Wang, Y. Zhou, M. Cui, *Int. J. Hydrogen Energ.*, **2021**, *46*, 20481.
- [10] C. Yang, S. Zhang, Y. Huang, K. Lv, S. Fang, X. Wu, Q. Li, J. Fan, *Appl. Surf. Sci.*, **2020**, *505*, 144654.
- [11] Y. Zhang, Z. Chen, J. Li, Z. Lu, X. Wang, *J. Energy Chem.*, **2021**, *54*, 36.
- [12] S. Sun, J. Li, J. Cui, X. Gou, Q. Yang, S. Liang, Z. Yang, J. Zhang, *Inorg. Chem. Front.*, **2018**, *5*, 1721.
- [13] Y. Shang, Y. Wang, C. Lv, F. Jing, T. Liu, W. Li, S. Liu, G. Chen, *Chem. Eng. J.*, **2022**, *431*, 133898.
- [14] M. K. Hussien, A. Sabbah, M. Qorbani, M. H. Elsayed, P. Raghunath, T.-Y. Lin, S. Quadir, H.-Y. Wang, H.-L. Wu, D.-L. M. Tzou, M.-C. Lin, P.-W. Chung, H.-H. Chou, L.-C. Chen, K.-H. Chen, *Chem. Eng. J.*, **2022**, *430*, 132853.
- [15] L. Chen, D. Zhu, J. Li, X. Wang, J. Zhu, P. S. Francis, Y. Zheng, *Appl. Catal., B*, **2020**, *273*, 119050.
- [16] W. Fang, J. Liu, L. Yu, Z. Jiang, W. Shangguan, *Appl. Catal., B*, **2017**, *209*, 631.

- [17] H. Wang, B. Wang, Y. Bian, L. Dai, *ACS Appl. Mater. Interfaces*, 2017, **9**, 21730.
- [18] J. Wu, N. Li, X. H. Zhang, H. B. Fang, Y. Z. Zheng, X. Tao, *Appl. Catal., B*, 2018, **226**, 61.
- [19] J. Du, S. Li, Z. Du, S. Meng and B. Li, *Chem. Eng. J.*, 2021, **407**, 127114
- [20] Y. Li, S. Zhu, Y. Liang, Z. Li, S. Wu, C. Chang, S. Luo, Z. Cui, *Appl. Surf. Sci.*, 2021, **536**, 147743.
- [21] Y. Jiang, S. Fang, C. Cao, E. Hong, L. Zeng, W. Yang, L. Huang, C. Yang, *J. Colloid Interface Sci.*, 2022, **612**, 367.
